# Supplementary material for: Clinical Significance of Preoperative Hematological Parameters in Patients with D2-Resected, Node-Positive Stomach Cancer
Source: MDPI journal article supplement (doi:10.3390/biomedicines10071565), 2022-06-30
Supplement: s1 [file s1]

**Supplementary Table S1.** Patient characteristics before the propensity score matching.

| Variables             | All patients<br>( <i>n</i> = 998) | CCRT<br>( <i>n</i> = 579) | Chemotherapy alone<br>( <i>n</i> = 419) | <i>p</i> -value |
|-----------------------|-----------------------------------|---------------------------|-----------------------------------------|-----------------|
| Age                   |                                   |                           |                                         |                 |
| ≤ 65                  | 785 (78.7%)                       | 515 (88.9%)               | 270 (64.4%)                             | < 0.001*        |
| > 65                  | 213 (21.3%)                       | 64 (11.1%)                | 149 (35.6%)                             |                 |
| Sex                   |                                   |                           |                                         |                 |
| Male                  | 629 (63.0%)                       | 367 (63.4%)               | 262 (62.5%)                             | 0.782           |
| Female                | 369 (37.0%)                       | 212 (36.6%)               | 157 (37.5%)                             |                 |
| T stage               |                                   |                           |                                         |                 |
| T1-2                  | 376 (37.7%)                       | 200 (34.5%)               | 176 (42.0%)                             | 0.007*          |
| T3                    | 370 (37.1%)                       | 213 (36.8%)               | 157 (37.5%)                             |                 |
| T4                    | 252 (25.3%)                       | 166 (28.7%)               | 86 (20.5%)                              |                 |
| N stage               |                                   |                           |                                         |                 |
| N1                    | 340 (34.1%)                       | 172 (29.7%)               | 168 (40.1%)                             | < 0.001*        |
| N2                    | 315 (31.6%)                       | 166 (28.7%)               | 149 (35.6%)                             |                 |
| N3                    | 343 (34.4%)                       | 241 (41.6%)               | 102 (24.3%)                             |                 |
| Stage                 |                                   |                           |                                         |                 |
| IB-II                 | 452 (45.3%)                       | 230 (39.7%)               | 222 (53.0%)                             | < 0.001*        |
| III                   | 546 (54.7%)                       | 349 (60.3%)               | 197 (47.0%)                             |                 |
| Lauren classification |                                   |                           |                                         |                 |
| Non-intestinal        | 652 (65.3%)                       | 396 (68.4%)               | 256 (61.1%)                             | 0.017*          |
| Intestinal            | 346 (34.7%)                       | 183 (31.6%)               | 163 (38.9%)                             |                 |
| Surgical extent       |                                   |                           |                                         |                 |
| STG                   | 707 (70.8%)                       | 409 (70.6%)               | 298 (71.1%)                             | 0.868           |
| TG                    | 291 (29.2%)                       | 170 (29.4%)               | 121 (28.9%)                             |                 |
| Mean ANC (/μL)        | 3757.2                            | 3749.1                    | 3768.3                                  | 0.840           |
| Mean ALC (/μL)        | 2119.6                            | 2159.2                    | 2064.9                                  | 0.021*          |
| Mean AMC (/μL)        | 456.3                             | 456.6                     | 455.8                                   | 0.944           |

|                                       |       |       |       |        |
|---------------------------------------|-------|-------|-------|--------|
| Mean PC ( $\times 10^3/\mu\text{L}$ ) | 250.1 | 253.2 | 245.9 | 0.086  |
| Mean NLR                              | 1.952 | 1.880 | 2.051 | 0.044* |
| Mean LMR                              | 5.130 | 5.212 | 5.017 | 0.129  |
| Mean PLR                              | 129.4 | 126.6 | 133.2 | 0.080  |

CCRT, concurrent chemoradiotherapy; STG, subtotal gastrectomy; TG, total gastrectomy; ANC, absolute neutrophil count; ALC, absolute lymphocyte count; AMC, absolute monocyte count; PC, platelet count; NLR, neutrophil-to-lymphocyte ratio; LMR, lymphocyte-to-monocyte ration; PLR, platelet-to-lymphocyte ratio.

Asterisks (\*) indicate  $p < 0.005$ .

**Supplementary Table S2.** Comparison of patient characteristics according to absolute lymphocyte counts.

|                       | All patients      | ALC ≤ 2074.0 /μL  | ALC > 2074.0 /μL  |                 |
|-----------------------|-------------------|-------------------|-------------------|-----------------|
| Variables             | ( <i>n</i> = 692) | ( <i>n</i> = 347) | ( <i>n</i> = 345) | <i>p</i> -value |
| Age                   |                   |                   |                   |                 |
| ≤ 65                  | 550 (79.5%)       | 271 (78.1%)       | 279 (80.9%)       | 0.367           |
| > 65                  | 142 (20.5%)       | 76 (21.9%)        | 66 (19.1%)        |                 |
| Sex                   |                   |                   |                   |                 |
| Male                  | 417 (60.3%)       | 187 (53.9%)       | 230 (66.7%)       | 0.001*          |
| Female                | 275 (39.7%)       | 160 (46.1%)       | 115 (33.3%)       |                 |
| T stage               |                   |                   |                   |                 |
| 1-2                   | 288 (41.6%)       | 142 (40.9%)       | 146 (42.3%)       | 0.773           |
| 3                     | 262 (37.9%)       | 130 (37.5%)       | 132 (38.3%)       |                 |
| 4                     | 142 (20.5%)       | 75 (21.6%)        | 67 (19.4%)        |                 |
| N stage               |                   |                   |                   |                 |
| 1                     | 266 (38.4%)       | 129 (37.2%)       | 137 (39.7%)       | 0.171           |
| 2                     | 248 (35.8%)       | 118 (34.0%)       | 130 (37.7%)       |                 |
| 3                     | 178 (25.7%)       | 100 (28.8%)       | 78 (22.6%)        |                 |
| Stage                 |                   |                   |                   |                 |
| IB-II                 | 362 (52.3%)       | 175 (50.4%)       | 187 (54.2%)       | 0.321           |
| III                   | 330 (47.7%)       | 172 (49.6%)       | 158 (45.8%)       |                 |
| Lauren classification |                   |                   |                   |                 |
| Non-intestinal        | 458 (66.2%)       | 236 (68.%)        | 222 (64.3%)       | 0.308           |
| Intestinal            | 234 (33.8%)       | 111 (32.0%)       | 123 (35.7%)       |                 |
| Surgical extent       |                   |                   |                   |                 |
| STG                   | 479 (69.2%)       | 235 (67.7%)       | 244 (70.7%)       | 0.392           |
| TG                    | 213 (30.8%)       | 112 (32.3%)       | 101 (29.3%)       |                 |
| Adjuvant treatment    |                   |                   |                   |                 |
| CCRT                  | 346 (50.0%)       | 163 (47.0%)       | 183 (53.0%)       | 0.110           |
| Chemotherapy alone    | 346 (50.0%)       | 184 (53.0%)       | 162 (47.0%)       |                 |

|                            |             |             |             |          |
|----------------------------|-------------|-------------|-------------|----------|
| ANC (/μL)                  |             |             |             |          |
| ≤ 3448.5                   | 346 (50.0%) | 192 (55.3%) | 154 (44.6%) | 0.005*   |
| > 3448.5                   | 346 (50.0%) | 155 (44.7%) | 191 (55.4%) |          |
| AMC (/μL)                  |             |             |             |          |
| ≤ 422.5                    | 346 (50.0%) | 211 (60.8%) | 135 (39.1%) | < 0.001* |
| > 422.5                    | 346 (50.0%) | 136 (39.2%) | 210 (60.9%) |          |
| PC (× 10 <sup>3</sup> /μL) |             |             |             |          |
| ≤ 240.5                    | 346 (50.0%) | 179 (51.6%) | 167 (48.4%) | 0.403    |
| > 240.5                    | 346 (50.0%) | 168 (48.4%) | 178 (51.6%) |          |
| NLR                        |             |             |             |          |
| ≤ 1.657                    | 347 (50.1%) | 104 (30.0%) | 243 (70.4%) | < 0.001* |
| > 1.657                    | 345 (49.9%) | 243 (70.0%) | 102 (29.6%) |          |
| LMR                        |             |             |             |          |
| ≤ 4.956                    | 346 (50.0%) | 224 (64.6%) | 122 (35.4%) | < 0.001* |
| > 4.956                    | 346 (50.0%) | 123 (35.4%) | 223 (64.6%) |          |
| PLR                        |             |             |             |          |
| ≤ 117.6                    | 346 (50.0%) | 84 (24.2%)  | 262 (75.9%) | < 0.001* |
| > 117.6                    | 346 (50.0%) | 263 (75.8%) | 83 (24.1%)  |          |

ALC, absolute lymphocyte count; STG, subtotal gastrectomy; TG, total gastrectomy; CCRT, concurrent chemoradiotherapy; ANC, absolute neutrophil count; AMC, absolute monocyte count; PC, platelet count; NLR, neutrophil-to-lymphocyte ratio; LMR, lymphocyte-to-monocyte ration; PLR, platelet-to-lymphocyte ratio

Asterisks (\*) indicate  $p < 0.005$ .
